# Supplementary material for: Extraction of Am(iii) using novel solvent systems containing a tripodal diglycolamide ligand in room temperature ionic liquids: a ‘green’ approach for radioactive waste processing
Source: Royal Society of Chemistry journal article supplement (doi:10.1039/c2ra20577g), 2012-01-01

**Extraction of Am(III) using a tripodal diglycolamide in room temperature  
ionic liquids: A ‘green’ approach for radioactive waste processing**

Arijit Sengupta<sup>1</sup>, Prasanta K. Mohapatra<sup>1,\*</sup>, Mudassir Iqbal<sup>2</sup>, Willem Verboom<sup>2</sup>, Jurriaan  
Huskens<sup>2</sup> and Shrikant V. Godbole<sup>1</sup>

**Electronic Supporting Information**

## 1. Synthesis of T-DGA

The characterization data of tripodal diglycolamide was done by NMR and Mass Spectrometry. The results are given below.

$^1\text{H}$  NMR ( $\text{CDCl}_3$ ):  $\delta$  0.80-0.91 (39 H, m), 1.20-1.35 (74 H, m), 1.44-1.61 (12 H, m), 1.63-1.92 (6 H, m), 3.10-3.47 (34 H, m), 4.25-4.37 (12 H, m); MS (MALDI)  $m/z$  1535.0 ( $\text{M}+\text{H}$ ) $^+$ , 1557.0 ( $\text{M}+\text{Na}$ ) $^+$ .

## 2. Solvent extraction studies

### 2.1 Stripping studies

Stripping data for three stage batch extraction data is presented in the following Table.

Table S-1: Stripping data for Am(III) using an extract made from  $1.0 \times 10^{-3}$  M T-DGA in  $\text{C}_4\text{mim}^+.\text{NTf}_2^-$

| Strippant                                                                                       | Cumulative % Am stripping with volume ratio (Aq. / org.) of 1 |          |           |
|-------------------------------------------------------------------------------------------------|---------------------------------------------------------------|----------|-----------|
|                                                                                                 | I stage                                                       | II stage | III stage |
| 0.05 M EDTA +<br>1 M Guanidine<br>carbonate                                                     | 78.3                                                          | 95.3     | 99        |
| 0.05 M EDTA +<br>1 M Guanidine<br>carbonate                                                     | 79.3                                                          | 95.7     | 99.1      |
| Buffer mixture<br>(0.1 M Formic<br>acid + 0.4 M<br>Citric acid + 0.4<br>M hydrazine<br>hydrate) | 7.07                                                          | 13.7     | 19.8      |

## 2.2 Temperature variation studies

Am(III) distribution data as a function of temperature are presented below.

| Temperature (K) | C <sub>4</sub> mim <sup>+</sup> .NTf <sub>2</sub> <sup>-</sup> | C <sub>6</sub> mim <sup>+</sup> .NTf <sub>2</sub> <sup>-</sup> | C <sub>8</sub> mim <sup>+</sup> .NTf <sub>2</sub> <sup>-</sup> |
|-----------------|----------------------------------------------------------------|----------------------------------------------------------------|----------------------------------------------------------------|
| 313             | 35.9                                                           | 15.1                                                           | 1.52                                                           |
| 303             | 91.1                                                           | 32.3                                                           | 3.13                                                           |
| 298             | 207                                                            | 65.8                                                           | 6.06                                                           |
| 293             | 316                                                            | 102.6                                                          | 9.55                                                           |

### 3. Time Resolved Laser Fluorescence Spectroscopy studies

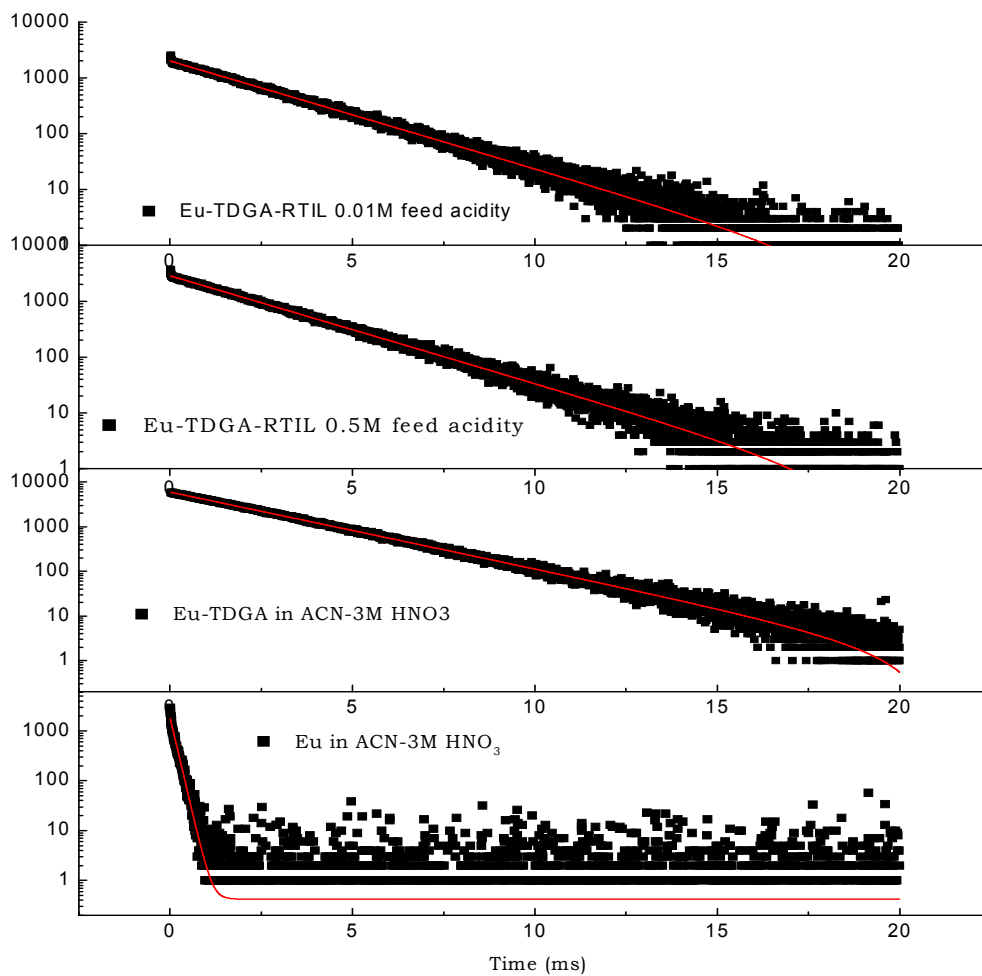

Supplement: c2ra20577g.pdf [file c2ra20577g.pdf]
